# Supplementary material for: Prosteatotic and Protective Components in a Unique Model of Fatty Liver: Gut Microbiota and Suppressed Complement System
Source: PubMed Central journal article supplement (PMC4994046; doi:10.1038/srep31763), 2016-08-23
Supplement: srep31763-s1.pdf [file srep31763-s1.pdf]

## Supplementary Materials for

### **Proteatotic and Protective Components in a Unique Model of Fatty Liver: Gut Microbiota and Suppressed Complement System**

Long Liu<sup>1</sup>, Xing Zhao<sup>1</sup>, Qian Wang<sup>1</sup>, Xiaoxian Sun<sup>1</sup>, Lili Xia<sup>1</sup>, Qianqian Wang<sup>1</sup>, Biao Yang<sup>1</sup>, Yihui Zhang<sup>1</sup>, Sean Montgomery<sup>2</sup>, He Meng<sup>3</sup>, Tuoyu Geng<sup>1\*</sup>, and Daoqing Gong<sup>1\*</sup>

Correspondence should be addressed to T. G. ([tygeng@yzu.edu.cn](mailto:tygeng@yzu.edu.cn)) or D.G. ([yzgong@163.com](mailto:yzgong@163.com)).

This file includes:

Supplementary Figure 1 to 8 (pp 2-7)

Supplementary Table 1 to 17 (pp 8-14)

Supplementary Methods (pp 15)

## Supplementary Figures

**Supplementary Figure 1. The length distributions of contigs, transcripts and unigenes that were identified by analysis of goose liver transcriptome**

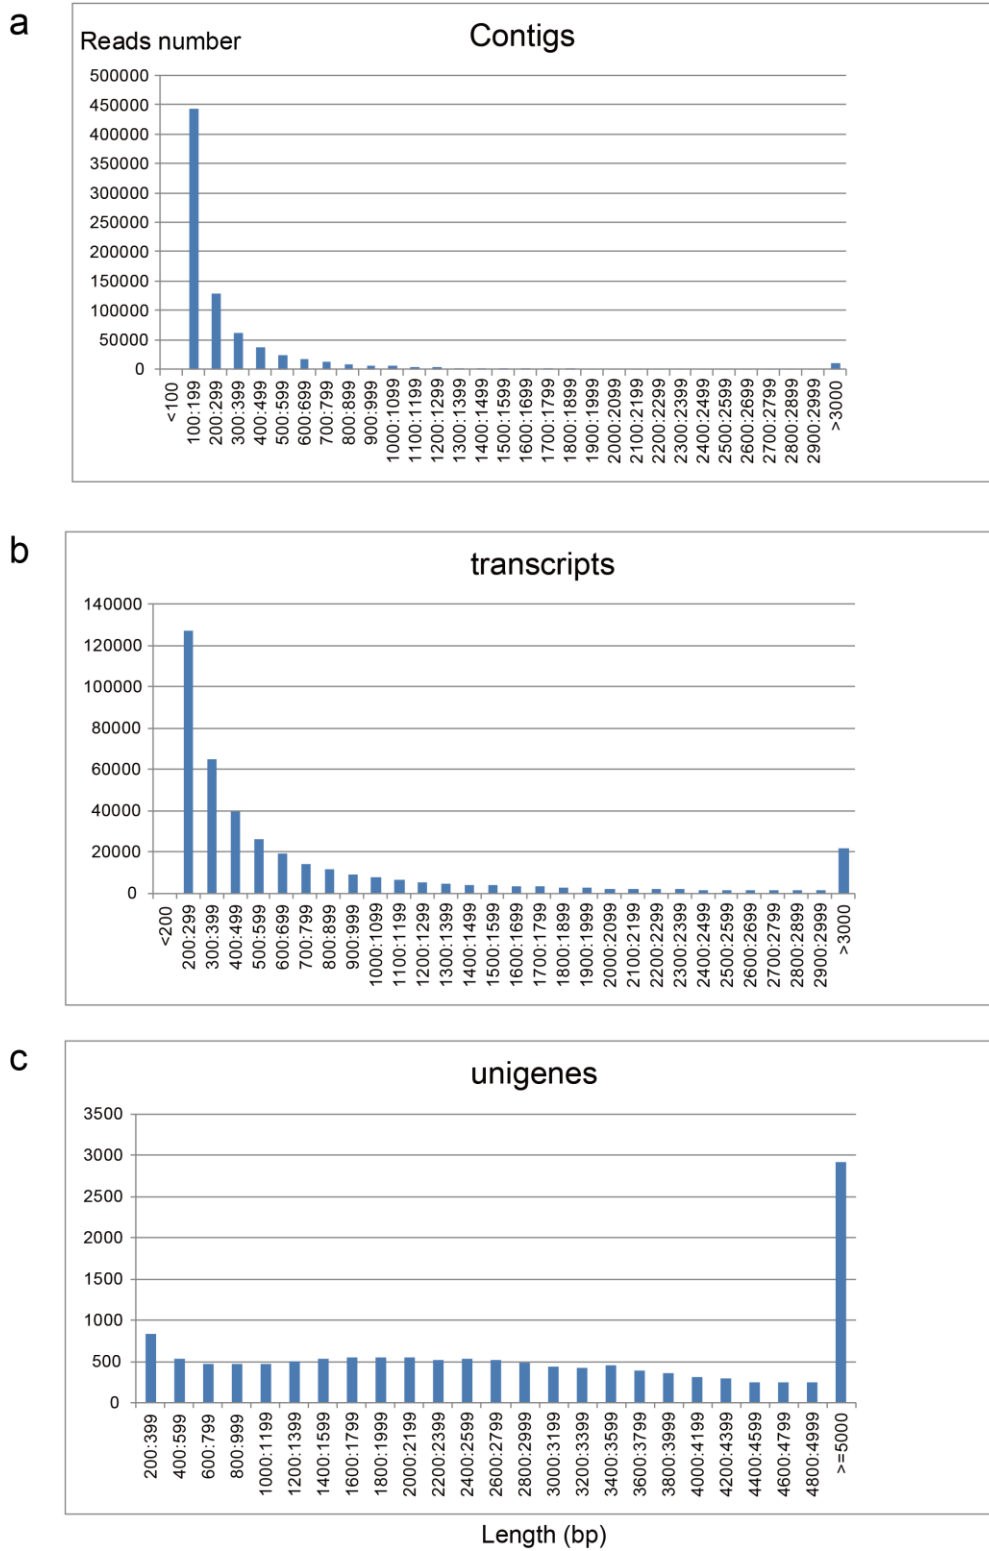

**Supplementary Figure 2. The distribution of the unigenes classified by gene function**

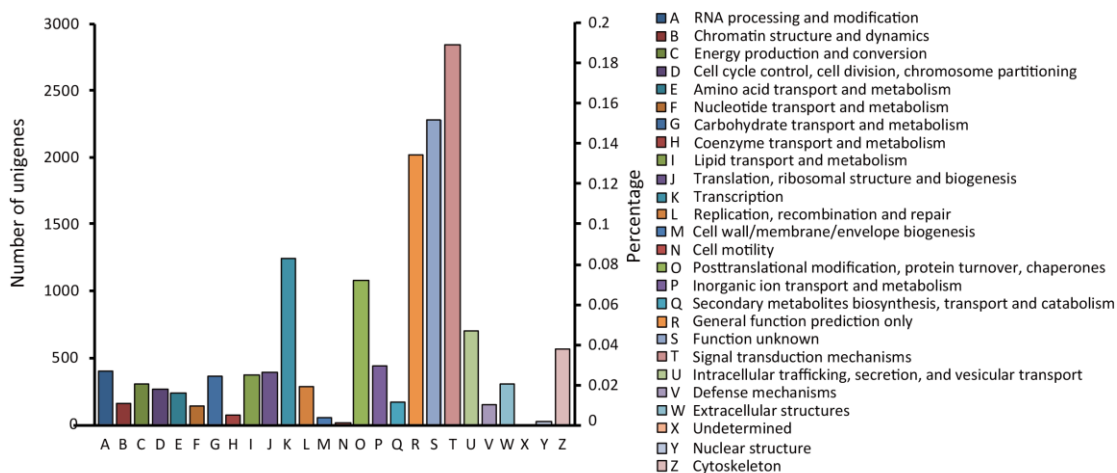

The abbreviation illustration was present on the right.

**Supplementary Figure 3. The distribution of the sequences obtained from small RNA sequencing**

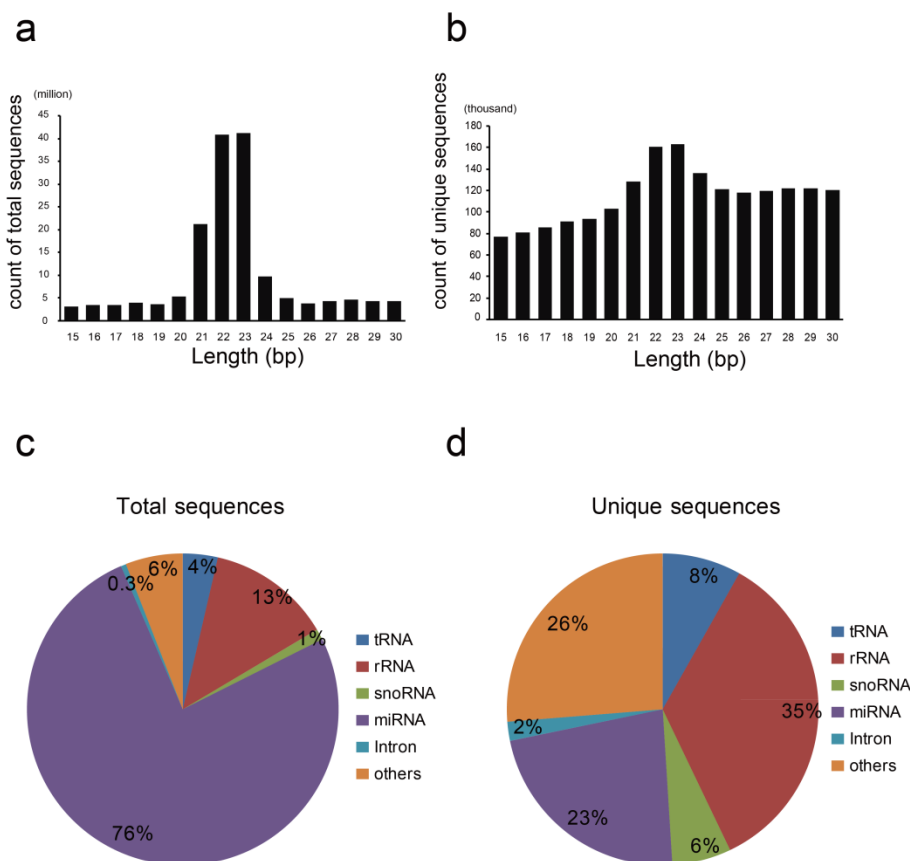

(a) Length distribution of the sequences obtained from small RNA sequencing. (b) The abundance distribution of unique sequences with 15-30 bp long selected from small RNA sequences. (c) The abundance of different types of small RNAs obtained from small RNA sequencing. (d) The abundance of unique small RNAs by type obtained from small RNA sequencing.

**Supplementary Figure 4. The abundance distribution of miRNAs categorized by the reads number**

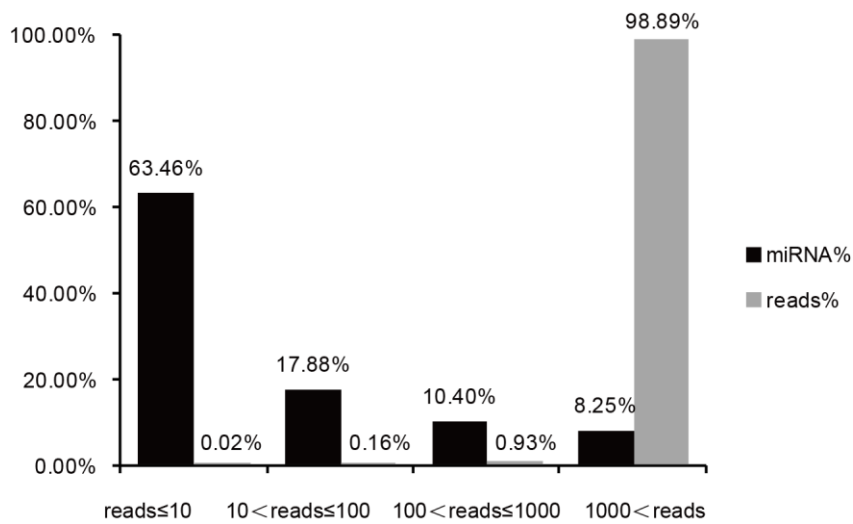

**Supplementary Figure 5. Predicted target genes of differentially expressed miRNAs (DEMs) using the differentially expressed genes (DEGs) from liver transcriptome analysis as a source**

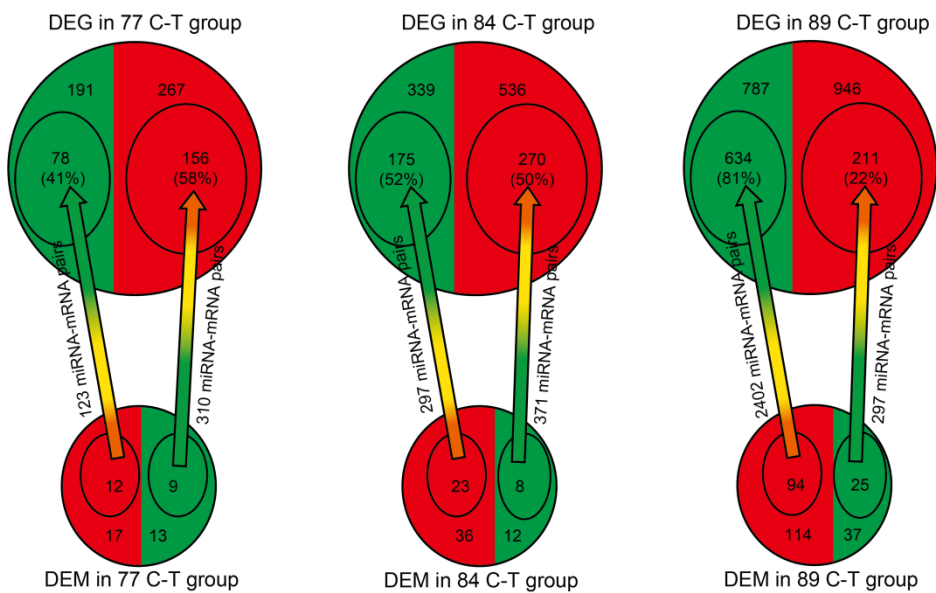

77C-T, 84 C-T and 89 C-T denote the comparisons between the control and overfed groups at day 7, 14 and 19 of overfeeding, respectively. Red or green background colors indicate DEM and DEG upregulated or downregulated in overfed group versus control group, respectively.

**Supplementary Figure 6. The OTU classifications at phylum level with microbial abundance indicated using data from intestinal metagenome analysis**

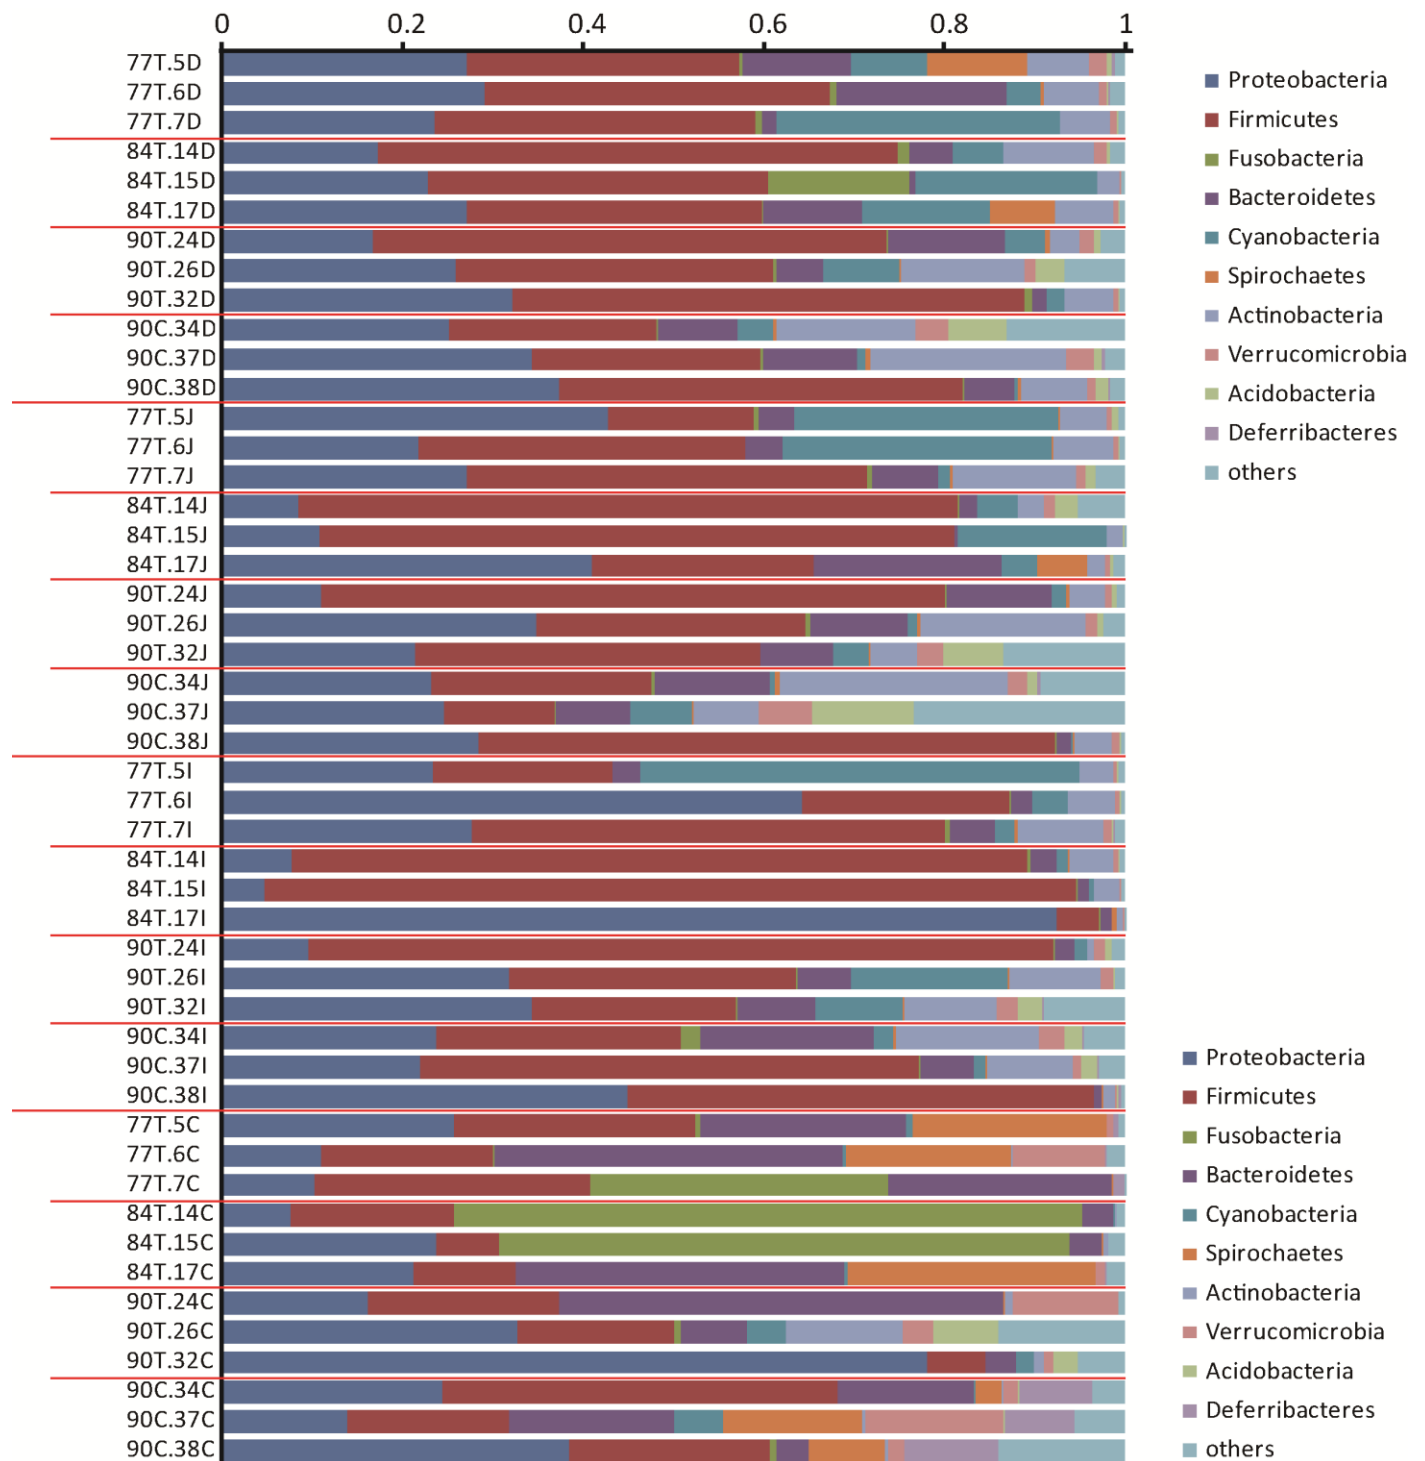

In the sample identities shown on the left, 77T, 84T and 89T denote that the microbes are from the intestinal segments (i.e., D for duodenum, J for jejunum, I for ileum, and C for caecum) of the overfed geese at 77, 84, and 89 days of age, respectively. 77C, 74C and 89C are correspondingly for the control geese 7, 14 and 19 of overfeeding, 89C denotes control group at day 19 of overfeeding and. The color bars are illustrated on the right. N=3 for each group.

**Supplementary Figure 7. The abundance distribution of the main genera in ten most abundant phyla revealed by metagenomics analysis of goose intestinal microbiota**

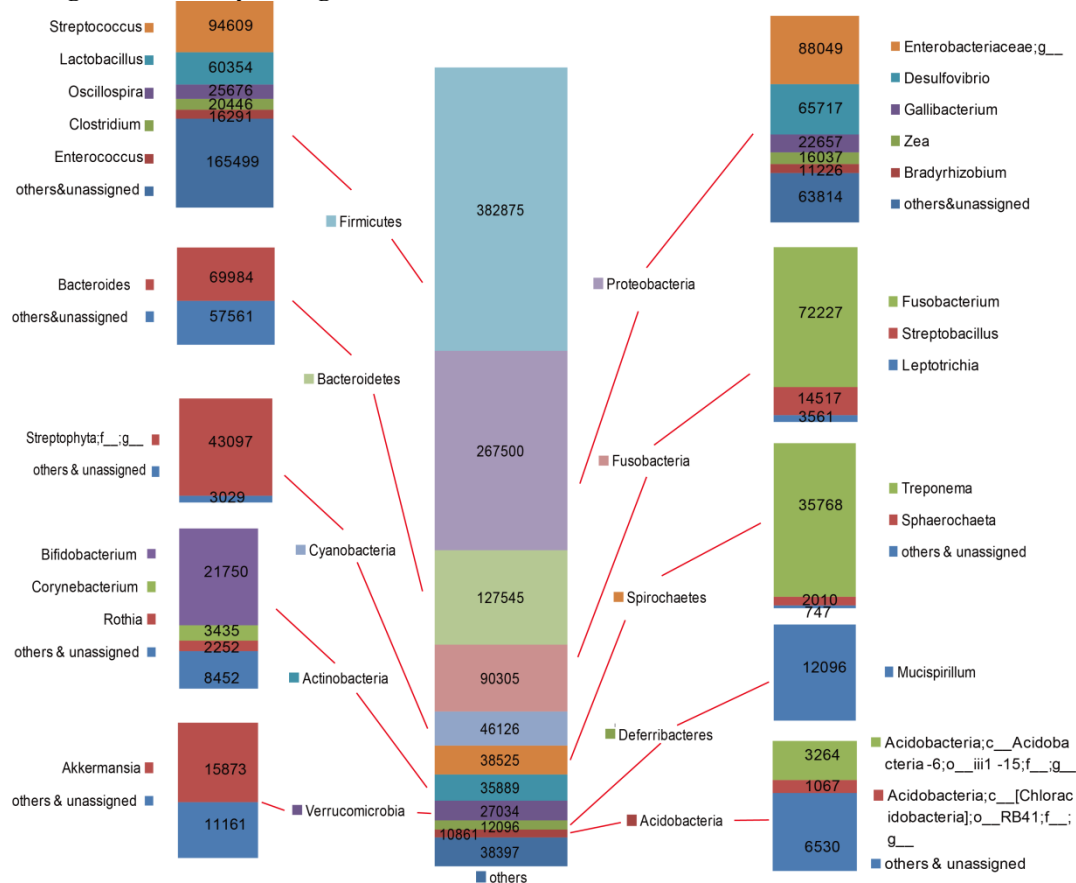

The color bars in the center of the figure indicate the ten most abundant phyla while the color bars on the left and right sides of the figure indicate the main genera of the corresponding phyla. In the names of microbes, ‘c’, ‘o’, ‘f’ and ‘g’ denote class, order, family and genus, respectively. The missing names after ‘c’, ‘o’, ‘f’ and ‘g’ denote that the class, order, family or genus were unassigned.

**Supplementary Figure 8.** The image illustrate the sites for the intestinal content samples collected from different segments including duodenum, jejunum, ileum and caecum, which are framed by rectangles

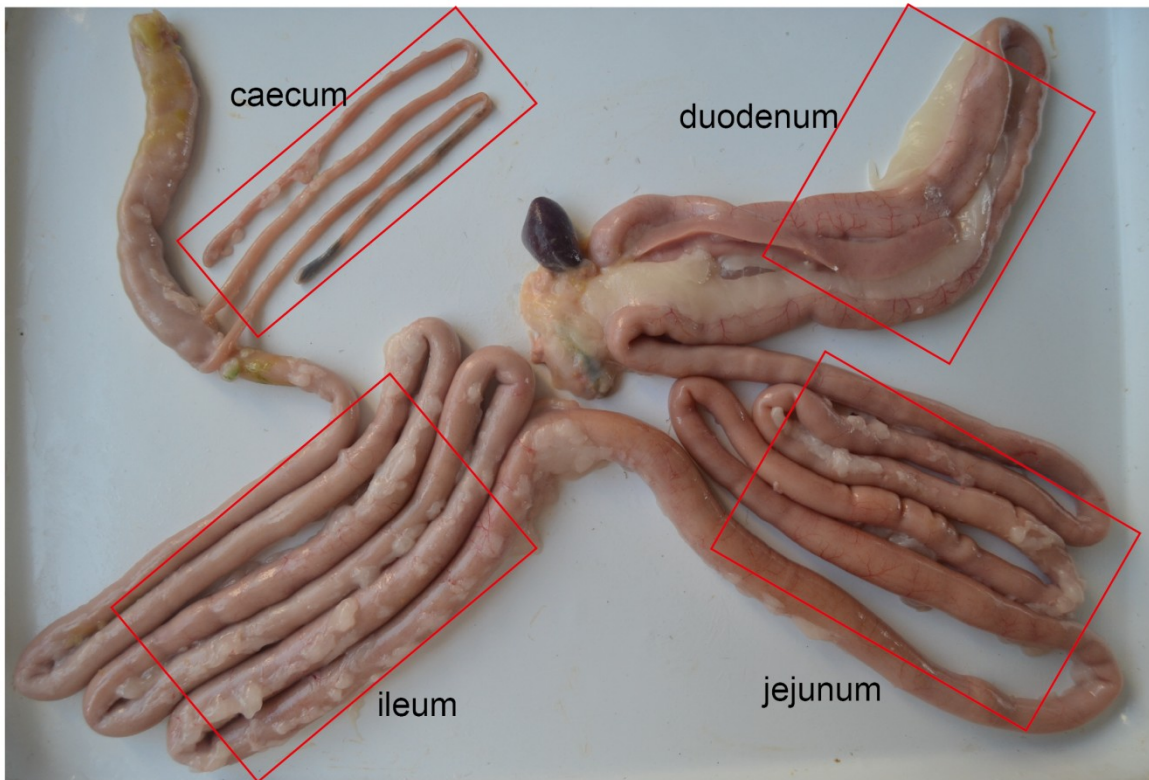

## Supplementary Tables

**Supplementary Table S1. Blood chemistry in the overfed Landes geese vs the control geese at day 14 of overfeeding**

|                                 | Number | Control                 | Overfeeding                |
|---------------------------------|--------|-------------------------|----------------------------|
| ALT/(U.L <sup>-1</sup> )        | 6      | 8.25 <sup>A</sup> ±1.30 | 63.75 <sup>B</sup> ±11.86  |
| AST/(U.L <sup>-1</sup> )        | 6      | 8.25 <sup>A</sup> ±1.30 | 210.00 <sup>B</sup> ±53.39 |
| CHO/(nmol.L <sup>-1</sup> )     | 6      | 3.49 <sup>A</sup> ±0.38 | 5.17 <sup>B</sup> ±1.13    |
| TG/(nmol.L <sup>-1</sup> )      | 6      | 0.84 <sup>A</sup> ±0.75 | 2.32 <sup>B</sup> ±0.88    |
| HDL-C/(nmol.L <sup>-1</sup> )   | 6      | 2.24 <sup>A</sup> ±0.20 | 3.45 <sup>B</sup> ±0.99    |
| LDL-C/(nmol.L <sup>-1</sup> )   | 6      | 0.94±0.21               | 0.78±0.12                  |
| Glucose/(mmol.L <sup>-1</sup> ) | 6      | 10.18±0.29              | 10.67±0.17                 |

Different superscripts denote  $P < 0.05$ . ALT, glutamic-pyruvic transaminase; AST, glutamic oxalacetic transaminase; CHO, total cholesterol; TG, triglyceride; HDL-C, high-density lipoprotein-cholesterol; LDL-C, low-density lipoprotein-cholesterol. Glucose levels were measured using a glucometer (Sinocare; ChangSha, Inc.). Other parameters were determined using Hitachi 7170 Chemistry Analyzer.

**Supplementary Table S2. An outline of the raw data and clean data from transcriptome sequencing**

| Sample <sup>a</sup> | Reads  | Raw Reads  | Raw Data(bp)   | Q20 <sup>b</sup><br>(%) | GC(%) | Clean Reads | Clean<br>Reads<br>(%) | Clean Data(bp) | Clean<br>data <sup>c</sup><br>(%) |
|---------------------|--------|------------|----------------|-------------------------|-------|-------------|-----------------------|----------------|-----------------------------------|
| 70C-1               | Paired | 37,728,211 | 9,432,052,750  | 96.37                   | 56.13 | 34,674,153  | 91.91                 | 8,465,168,372  | 89.75                             |
| 70C-3               | Paired | 41,642,993 | 10,410,748,250 | 96.18                   | 56.12 | 37,889,558  | 90.99                 | 9,268,556,024  | 89.03                             |
| 70C-4               | Paired | 40,867,433 | 10,216,858,250 | 96.35                   | 55.41 | 37,441,691  | 91.62                 | 9,172,367,994  | 89.78                             |
| 77T-5               | Paired | 36,062,072 | 9,015,518,000  | 96.28                   | 57.21 | 32,992,330  | 91.49                 | 8,085,501,361  | 89.68                             |
| 77T-6               | Paired | 35,101,185 | 8,775,296,250  | 97.58                   | 57.51 | 33,077,203  | 94.23                 | 8,157,125,073  | 92.96                             |
| 77T-7               | Paired | 32,973,964 | 8,243,491,000  | 97.11                   | 55.98 | 30,621,860  | 92.87                 | 7,511,107,612  | 91.12                             |
| 77C-10              | Paired | 27,545,454 | 6,886,363,500  | 97.12                   | 55.84 | 25,592,671  | 92.91                 | 6,262,019,368  | 90.93                             |
| 77C-12              | Paired | 34,956,997 | 8,739,249,250  | 97.06                   | 56.76 | 32,398,904  | 92.68                 | 7,939,511,716  | 90.85                             |
| 77C-13              | Paired | 29,154,022 | 7,288,505,500  | 97.05                   | 56.17 | 26,984,319  | 92.56                 | 6,631,363,801  | 90.98                             |
| 84T-15              | Paired | 31,992,710 | 7,998,177,500  | 97.13                   | 57.91 | 29,725,149  | 92.91                 | 7,273,695,913  | 90.94                             |
| 84T-16              | Paired | 30,891,977 | 7,722,994,250  | 97.32                   | 57.47 | 28,868,937  | 93.45                 | 7,134,946,787  | 92.39                             |
| 84T-17              | Paired | 28,791,293 | 7,197,823,250  | 97.42                   | 57.04 | 26,972,184  | 93.68                 | 6,666,367,906  | 92.62                             |
| 84C-20              | Paired | 28,846,543 | 7,211,635,750  | 97.57                   | 56.23 | 27,193,301  | 94.27                 | 6,720,187,661  | 93.19                             |
| 84C-22              | Paired | 27,899,427 | 6,974,856,750  | 97.36                   | 56.53 | 26,179,554  | 93.84                 | 6,460,986,485  | 92.63                             |
| 84C-23              | Paired | 27,088,691 | 6,772,172,750  | 97.25                   | 56.49 | 25,309,133  | 93.43                 | 6,251,042,980  | 92.30                             |
| 89T-26              | Paired | 28,831,029 | 7,207,757,250  | 97.14                   | 57.87 | 26,906,752  | 93.33                 | 6,637,490,460  | 92.09                             |
| 89T-31              | Paired | 32,104,319 | 8,026,079,750  | 97.26                   | 56.52 | 30,064,264  | 93.65                 | 7,420,448,058  | 92.45                             |
| 89T-32              | Paired | 39,713,938 | 9,928,484,500  | 97.30                   | 57.07 | 37,258,203  | 93.82                 | 9,196,140,475  | 92.62                             |
| 89C-36              | Paired | 29,286,979 | 7,321,744,750  | 97.45                   | 56.16 | 27,567,173  | 94.13                 | 6,808,635,682  | 92.99                             |
| 89C-37              | Paired | 36,016,380 | 9,004,095,000  | 97.37                   | 56.71 | 33,775,020  | 93.78                 | 8,340,797,228  | 92.63                             |
| 89C-38              | Paired | 33,064,526 | 8,266,131,500  | 97.28                   | 56.36 | 30,932,766  | 93.55                 | 7,634,181,817  | 92.35                             |

<sup>a</sup> 70C-1, 3 and 4 are the liver samples from the normally fed geese (control or C group) at 70 days of age; 77T-5, 6 and 7 are the liver samples from the overfed geese (treatment or T group) at 77 days of age (or at day 7 of overfeeding); the liver samples harvested at 84 and 89 days of age are similarly named. N=3 for each group.

<sup>b</sup> denotes the percentage of data with base calling accuracy higher than 99%.



<sup>c</sup> denotes the proportion of clean data in raw data.

**Supplementary Table S3. Summary of contigs, transcripts and unigenes from liver transcriptome analysis**

|            | Total length | Number  | Max length | Average length | GC (%) |
|------------|--------------|---------|------------|----------------|--------|
| Contig     | 303,720,385  | 802,368 | 27,786     | 378.53         | 47.07  |
| transcript | 334,838,335  | 391,049 | 27,786     | 856            | 48.08  |
| unigene    | 46,600,489   | 13,973  | 27,786     | 3,335          | 49.26  |

**Supplementary Table S4. The detailed annotations of unigenes from liver transcriptome analysis**

See a separate supplementary file: Supplementary Table S4.xlsx

**Supplementary Table S5. Detailed information on differentially expressed genes in the livers of the overfed vs normally fed geese**

See a separate supplementary file: Supplementary Table S5.xlsx

**Supplementary Table S6. Detailed information on differentially expressed genes in the ‘carbohydrate metabolism, lipid metabolism, amino acid metabolism, cell growth and death and immune diseases’ pathways**

See a separate supplementary file: Supplementary Table S6.xlsx

**Supplementary Table S7. An outline of raw data and clean data from small RNA sequencing**

| Sample <sup>a</sup> | No. of Raw Reads | No. of Clean Reads | Clean Reads (%) | No. of Reads between 15-30 nt | No. of Reads mapped to Rfam <sup>a</sup> | Reads mapped to Rfam (%) |
|---------------------|------------------|--------------------|-----------------|-------------------------------|------------------------------------------|--------------------------|
| 70C-1               | 15,031,800       | 10,438,660         | 69.44           | 7,581,396                     | 6,014,608                                | 79.33                    |
| 70C-3               | 11,986,407       | 8,194,500          | 68.36           | 5,984,715                     | 4,967,801                                | 83.01                    |
| 70C-4               | 11,092,808       | 7,704,667          | 69.46           | 5,914,644                     | 5,011,662                                | 84.73                    |
| 77T-5               | 10,726,369       | 7,582,036          | 70.69           | 5,788,205                     | 4,943,948                                | 85.41                    |
| 77T-6               | 8,964,612        | 6,362,103          | 70.97           | 4,893,824                     | 3,955,075                                | 80.82                    |
| 77T-7               | 11,452,336       | 7,859,957          | 68.63           | 5,101,201                     | 4,296,818                                | 84.23                    |
| 77C-10              | 10,079,181       | 7,229,215          | 71.72           | 5,763,364                     | 4,597,991                                | 79.78                    |
| 77C-12              | 11,808,753       | 8,480,073          | 71.81           | 7,135,624                     | 6,258,326                                | 87.71                    |
| 77C-13              | 17,539,435       | 14,743,019         | 84.06           | 11,645,613                    | 9,360,350                                | 80.38                    |
| 84T-15              | 13,755,617       | 12,015,071         | 87.35           | 9,527,134                     | 8,271,424                                | 86.82                    |
| 84T-16              | 13,344,954       | 11,589,900         | 86.85           | 9,106,981                     | 7,639,201                                | 83.88                    |
| 84T-17              | 13,608,421       | 11,488,307         | 84.42           | 8,931,022                     | 7,782,528                                | 87.14                    |
| 84C-20              | 10,674,166       | 9,520,982          | 89.20           | 8,193,572                     | 7,256,559                                | 88.56                    |
| 84C-22              | 12,252,717       | 10,456,564         | 85.34           | 8,652,289                     | 7,331,380                                | 84.73                    |
| 84C-23              | 12,047,368       | 10,378,200         | 86.14           | 8,470,924                     | 7,448,008                                | 87.92                    |
| 89T-26              | 10,592,451       | 9,146,103          | 86.35           | 6,747,546                     | 5,712,806                                | 84.66                    |
| 89T-31              | 14,088,213       | 12,183,064         | 86.48           | 9,426,969                     | 8,232,975                                | 87.33                    |
| 89T-32              | 13,109,131       | 10,695,514         | 81.59           | 7,001,663                     | 5,750,326                                | 82.13                    |
| 89C-36              | 11,925,590       | 10,616,818         | 89.03           | 9,296,907                     | 8,615,462                                | 92.67                    |
| 89C-37              | 11,766,552       | 10,248,238         | 87.10           | 7,922,801                     | 6,868,075                                | 86.69                    |
| 89C-38              | 10,979,608       | 9,567,437          | 87.14           | 7,487,180                     | 6,283,083                                | 83.92                    |

<sup>a</sup> 70C-1, 3 and 4 are the liver samples from the normally fed geese (control or C group) at 70 days of age; 77T-5, 6 and 7 are the liver samples from the overfed geese (treatment or T group) at 77 days of age (or at day 7 of overfeeding); the liver samples harvested at 84 and 89 days of age are similarly named. N=3 for each group.

<sup>b</sup> denotes the Rfam database which is a collection of RNA families.

**Supplementary Table S8. List of most highly expressed miRNAs in the liver**

See a separate supplementary file: Supplementary Table S8.xlsx

**Supplementary Table S9. Detailed information on the differentially expressed microRNA in the livers of the overfed (treatment or T group) vs. normally fed geese (control or C group)**

See a separate supplementary file: Supplementary Table S9.xlsx

**Supplementary Table S10. Predicted target genes of differentially expressed miRNAs using differentially expressed genes identified in liver transcriptome analysis as a source of target genes**

See a separate supplementary file: Supplementary Table S10.xlsx

**Supplementary Table S11. An outline of the sequences obtained from gut microbial metagenome analysis**

| Group  | Individual | Intestinal segment | No. of valid sequence | No. of High quality sequence | Group    | Individual | Intestinal segment | No. of valid sequence | No. of High quality sequence |
|--------|------------|--------------------|-----------------------|------------------------------|----------|------------|--------------------|-----------------------|------------------------------|
| 77T    | 77T-5      | Duodenum           | 23,976                | 7,152                        | 89T-24   | Duodenum   | 49,790             | 30,305                |                              |
|        |            | Ileum              | 29,534                | 19,464                       |          | Ileum      | 37,361             | 29,636                |                              |
|        |            | Jejunum            | 20,014                | 6,602                        |          | Jejunum    | 63,643             | 45,338                |                              |
|        |            | caecum             | 23,087                | 17,999                       |          | caecum     | 86,810             | 63,126                |                              |
|        | 77T-6      | Duodenum           | 23,869                | 9,267                        | 89T-26   | Duodenum   | 18,238             | 6,749                 |                              |
|        |            | Ileum              | 17,012                | 8,627                        |          | Ileum      | 28,663             | 18,026                |                              |
|        |            | Jejunum            | 19,938                | 10,783                       |          | Jejunum    | 25,226             | 7,772                 |                              |
|        |            | caecum             | 49,390                | 36,922                       |          | caecum     | 36,480             | 20,354                |                              |
|        | 77T-7      | Duodenum           | 25,310                | 12,153                       | 89T-32   | Duodenum   | 57,802             | 44,637                |                              |
|        |            | Ileum              | 22,740                | 4,491                        |          | Ileum      | 37,622             | 11,583                |                              |
|        |            | Jejunum            | 20,530                | 4,551                        |          | Jejunum    | 56,795             | 34,277                |                              |
|        |            | caecum             | 35,218                | 25,057                       |          | caecum     | 63,803             | 50,050                |                              |
| 84T-14 | Duodenum   | 58,606             | 30,639                | 89C-34                       | Duodenum | 21,958     | 7,578              |                       |                              |
|        | Ileum      | 66,333             | 33,015                |                              | Ileum    | 28,957     | 5,608              |                       |                              |
|        | Jejunum    | 78,089             | 55,282                |                              | Jejunum  | 33,922     | 4,299              |                       |                              |
|        | caecum     | 137,774            | 93,263                |                              | caecum   | 56,565     | 38,164             |                       |                              |
| 84T-15 | Duodenum   | 25,963             | 16,747                | 89C-37                       | Duodenum | 47,647     | 8,546              |                       |                              |
|        | Ileum      | 19,534             | 8,826                 |                              | Ileum    | 31,496     | 7,476              |                       |                              |
|        | Jejunum    | 21,949             | 14,390                |                              | Jejunum  | 51,358     | 30,707             |                       |                              |
|        | caecum     | 36,959             | 23,273                |                              | caecum   | 48,532     | 39,144             |                       |                              |
| 84T-17 | Duodenum   | 23,288             | 7,913                 | 89C-38                       | Duodenum | 30,284     | 7,981              |                       |                              |
|        | Ileum      | 30,356             | 19,092                |                              | Ileum    | 45,147     | 26,992             |                       |                              |
|        | Jejunum    | 44,311             | 28,602                |                              | Jejunum  | 39,505     | 13,412             |                       |                              |
|        | caecum     | 59,151             | 47,817                |                              | caecum   | 65,810     | 54,713             |                       |                              |

NO. denotes number. 77T, 84T and 89T denote overfed group at day 7, 14 and 19 of overfeeding while 89C denotes control group at day 19 of overfeeding; 77T-5, 6 and 7 are the liver samples from the overfed geese (treatment or T group) at 77 days of age (or at day 7 of overfeeding); the liver samples harvested at 84 and 89 days of age are similarly named. N=3 for each group.

**Supplementary Table S12. The OTU classifications at phylum level from intestinal metagenome analysis (Average percentage)**

| Intestinal segment | Group | Firmicutes | Proteobacteria | Bacteroidetes | Cyanobacteria | Actinobacteria | Fusobacteri | Spirochaetes | Verrucomicrob | Acidobacteria | Deferribacter | others |
|--------------------|-------|------------|----------------|---------------|---------------|----------------|-------------|--------------|---------------|---------------|---------------|--------|
| Duodenum           | 77T   | 34.64      | 26.65          | 10.86         | 14.45         | 6.17           | 0.54        | 3.85         | 1.14          | 0.33          | 0.15          | 1.23   |
|                    | 84T   | 42.61      | 22.48          | 5.53          | 13.31         | 6.30           | 5.60        | 2.41         | 0.71          | 0.14          | 0.01          | 0.90   |
|                    | 90T   | 49.51      | 25.04          | 6.53          | 4.97          | 7.38           | 0.44        | 0.27         | 1.11          | 1.39          | 0.00          | 3.35   |
|                    | 90C   | 30.94      | 32.36          | 8.25          | 1.75          | 14.84          | 0.23        | 0.34         | 2.57          | 2.91          | 0.15          | 5.66   |
| Jejunum            | 77T   | 32.19      | 30.61          | 5.13          | 20.03         | 8.42           | 0.40        | 0.26         | 0.72          | 0.67          | 0.01          | 1.56   |
|                    | 84T   | 55.78      | 20.22          | 7.66          | 8.28          | 2.11           | 0.17        | 1.89         | 0.66          | 0.96          | 0.01          | 2.25   |
|                    | 90T   | 45.63      | 22.49          | 10.11         | 2.27          | 9.09           | 0.22        | 0.31         | 1.65          | 2.63          | 0.01          | 5.58   |
|                    | 90C   | 33.46      | 25.48          | 7.54          | 2.48          | 12.21          | 0.21        | 0.34         | 2.96          | 4.18          | 0.15          | 11.01  |
| Ileum              | 77T   | 31.62      | 38.55          | 3.42          | 18.23         | 6.16           | 0.27        | 0.18         | 0.54          | 0.17          | 0.05          | 0.82   |
|                    | 84T   | 58.56      | 35.02          | 1.82          | 0.64          | 2.71           | 0.23        | 0.23         | 0.32          | 0.08          | 0.00          | 0.38   |
|                    | 90T   | 45.53      | 25.31          | 5.60          | 9.45          | 7.01           | 0.17        | 0.16         | 1.62          | 1.24          | 0.02          | 3.89   |
|                    | 90C   | 44.65      | 30.25          | 8.59          | 1.20          | 8.80           | 0.73        | 0.28         | 1.36          | 1.25          | 0.21          | 2.68   |
| Caecum             | 77T   | 25.38      | 15.77          | 28.69         | 0.34          | 0.10           | 11.19       | 13.29        | 3.68          | 0.02          | 0.60          | 0.94   |
|                    | 84T   | 12.10      | 17.64          | 14.45         | 0.17          | 0.22           | 44.18       | 9.19         | 0.36          | 0.05          | 0.07          | 1.57   |
|                    | 90T   | 14.97      | 42.39          | 19.89         | 2.05          | 4.94           | 0.30        | 0.12         | 5.44          | 3.25          | 0.00          | 6.64   |
|                    | 90C   | 27.96      | 25.63          | 12.37         | 1.80          | 0.42           | 0.25        | 8.81         | 6.13          | 0.13          | 8.70          | 7.79   |
| Average            |       | 36.60      | 27.24          | 9.78          | 6.34          | 6.06           | 4.07        | 2.62         | 1.93          | 1.21          | 0.63          | 3.52   |

77T, 84T and 89T denote overfed group at day 7,14 and 19 of overfeeding, 89C denotes control group at day 19 of overfeeding. N=3 for each group.

**Supplementary Table S13. The ratio of *Firmicutes* to *Bacteroidetes* in different intestinal segments of the overfed vs normally fed geese at different overfeeding time**

|                                        | 77T  | 84T   | 90T  | 90C  | Average of 77T,84T and 89T |
|----------------------------------------|------|-------|------|------|----------------------------|
| Duodenum                               | 3.19 | 7.71  | 7.58 | 3.75 | 6.16                       |
| Jejunum                                | 6.27 | 7.28  | 4.51 | 4.44 | 6.02                       |
| Ileum                                  | 9.25 | 32.18 | 8.13 | 5.20 | 16.52                      |
| Caecum                                 | 0.88 | 0.84  | 0.75 | 2.26 | 0.82                       |
| Average of duodenum, jejunum and ileum | 6.24 | 15.72 | 6.74 | 4.46 |                            |

77T, 84T and 89T denote overfed group at day 7,14 and 19 of overfeeding, 89C denotes control group at day 19 of overfeeding. N=3 for each group.

**Supplementary Table S14. The genus-level clustered taxonomic groups that identified from intestinal microbial metagenome analysis**

See a separate supplementary file: Supplementary Table S14.xlsx

**Supplementary Table S15. Information for intestinal microbes that differentially inhabited different intestinal segments**

See a separate supplementary file: Supplementary Table S15.xlsx

**Supplementary Table S16. Pathway analysis on the differentially expressed genes in the livers and predicted functional genes of gut microbiota in the intestines of the overfed geese vs normally fed geese**

See a separate supplementary file: Supplementary Table S16.xlsx

**Supplementary Table S17. Levels of SCFA in the sera of the overfed vs normally-fed geese <sup>a</sup>**

|                         | <b>89C</b>                         | <b>89T</b>                         | <b>Fold change</b>    | <b>P-value</b> |
|-------------------------|------------------------------------|------------------------------------|-----------------------|----------------|
|                         | <b>(Mean ± Standard deviation)</b> | <b>(Mean ± Standard deviation)</b> | <b>(89T over 89C)</b> |                |
| <b>acetic acid</b>      | <b>15073±3850.12<sup>b</sup></b>   | <b>16871.67±5930.18</b>            | <b>1.12</b>           | <b>0.55</b>    |
| <b>propionic acid</b>   | <b>196456.67±124271.84</b>         | <b>188650.33±159663.64</b>         | <b>0.96</b>           | <b>0.93</b>    |
| <b>isobutanoic acid</b> | <b>2455.83±1444.36</b>             | <b>2665.67±832.99</b>              | <b>1.09</b>           | <b>0.76</b>    |
| <b>butanoic acid</b>    | <b>914.67±207.24</b>               | <b>1306.67±225.6</b>               | <b>1.43</b>           | <b>0.01</b>    |

<sup>a</sup> SCFA denotes short chain fatty acid, n=6.

<sup>b</sup> The data indicate integral peak areas.

**Supplementary Table S18. Detailed information on prediction of transcription factors of goose C5 and human C5**

See a separate supplementary file: Supplementary Table S18.xlsx

**Supplementary Table S19. Feed formula of the homemade feed used in the study**

See a separate supplementary file: Supplementary Table S19.xlsx

**Supplementary Table S20. The sequences of primers for quantitative real-time PCR**

| <b>Primer name</b>    | <b>sequence(5'to3')</b> |
|-----------------------|-------------------------|
| C3 forward            | TGGCGTTATGGTGGATGA      |
| C3 reverse            | CAGTGACGTAGAGCGAGTGTC   |
| C4 forward            | ACTGCTTACGCTCTGACGC     |
| C4 reverse            | CCACCGAGACTGCATTGTT     |
| C5 forward            | ACATTAGACCACCACGCTCCC   |
| C5 reverse            | CCGTTTGACAAGAAGGGAAT    |
| TNF $\alpha$ forward  | GTATGTGCAGCAACCCGTAG    |
| TNF $\alpha$ reverse  | TGGGCATTGCAATTTGGACA    |
| HNF1 $\alpha$ forward | AGAGCGTTCCCGTGATAAA     |
| HNF1 $\alpha$ reverse | AGGTTGGCGGTGTCTGTTA     |
| GAPDH forward         | GCCATCAATGATCCCTTCAT    |
| GAPDH reverse         | CTGGGGTTCACGCTCCTG      |

## Supplementary Methods

### Metabolites Extraction and Sample Derivatization

One hundred microliter of thawed plasma sample, 50  $\mu\text{L}$  of water, and 250  $\mu\text{L}$  of 0.2mg/mL aqueous NaOH were added to a glass vial, followed by adding 250  $\mu\text{L}$  of PrOH/pyridine solvent (v/v=3:2) and 50  $\mu\text{L}$  of PCF to the vial. After a brief vortex, the derivatization reaction was carried out under ultrasonication for 1 min. One hundred fifty microliter of hexane was then added to the reaction mixture, followed by 1 min of vortex and 10 min of centrifugation under 9000 g at 4  $^{\circ}\text{C}$ . The derivative extraction at upper hexane layer (150  $\mu\text{L}$ ) was transferred to a GC vial. The remaining solution was added with 100  $\mu\text{L}$  of hexane. The procedure for vortex and centrifugation was performed with the mixture in the same way as before. One hundred microliter of supernatant was transferred and combined with the supernatant that was previously transferred. Ten milligram of anhydrous sodium sulfate was added to the supernatant to remove traces of water. A 50  $\mu\text{L}$  of resultant mixture was vortexed prior to GC-MS analysis.

### GC-MS Analysis

Metabolomics instrumental analysis was performed on an Agilent 7890A gas chromatography system coupled to an Agilent 5975C inert MSD system (Agilent Technologies Inc., CA, USA). A HP-5ms fused-silica capillary column (30 m  $\times$  0.25 mm  $\times$  0.25  $\mu\text{m}$ ; Agilent J&W Scientific, Folsom, CA) was utilized to separate the derivatives. Helium (>99.999%) was used as a carrier gas at a constant flow rate of 1 mL/min through the column. Injection volume was 1  $\mu\text{L}$  in split mode with a ratio of 2:1, and the solvent delay time was 2.6 min. The initial oven temperature was held at 40  $^{\circ}\text{C}$  for 2 min, ramped to 70  $^{\circ}\text{C}$  at a rate of 10  $^{\circ}\text{C}/\text{min}$ , to 85  $^{\circ}\text{C}$  at a rate of 3  $^{\circ}\text{C}/\text{min}$ , to 290  $^{\circ}\text{C}$  at a rate of 41  $^{\circ}\text{C}/\text{min}$ , and finally held at 290  $^{\circ}\text{C}$  for 8 min. The temperatures of injector, transfer line, and electron impact ion source were set to 250  $^{\circ}\text{C}$ , 250  $^{\circ}\text{C}$ , and 230  $^{\circ}\text{C}$ , respectively. The impact energy was 70 eV, and data was collected in a sim mode (m/z 30-600).
